# Supplementary material for: China stroke surveillance report 2021
Source: Springer Nature journal article supplement (doi:10.1186/s40779-023-00463-x), 2023-07-19
Supplement: MOESM1 [file 40779_2023_463_MOESM1_ESM.pdf]

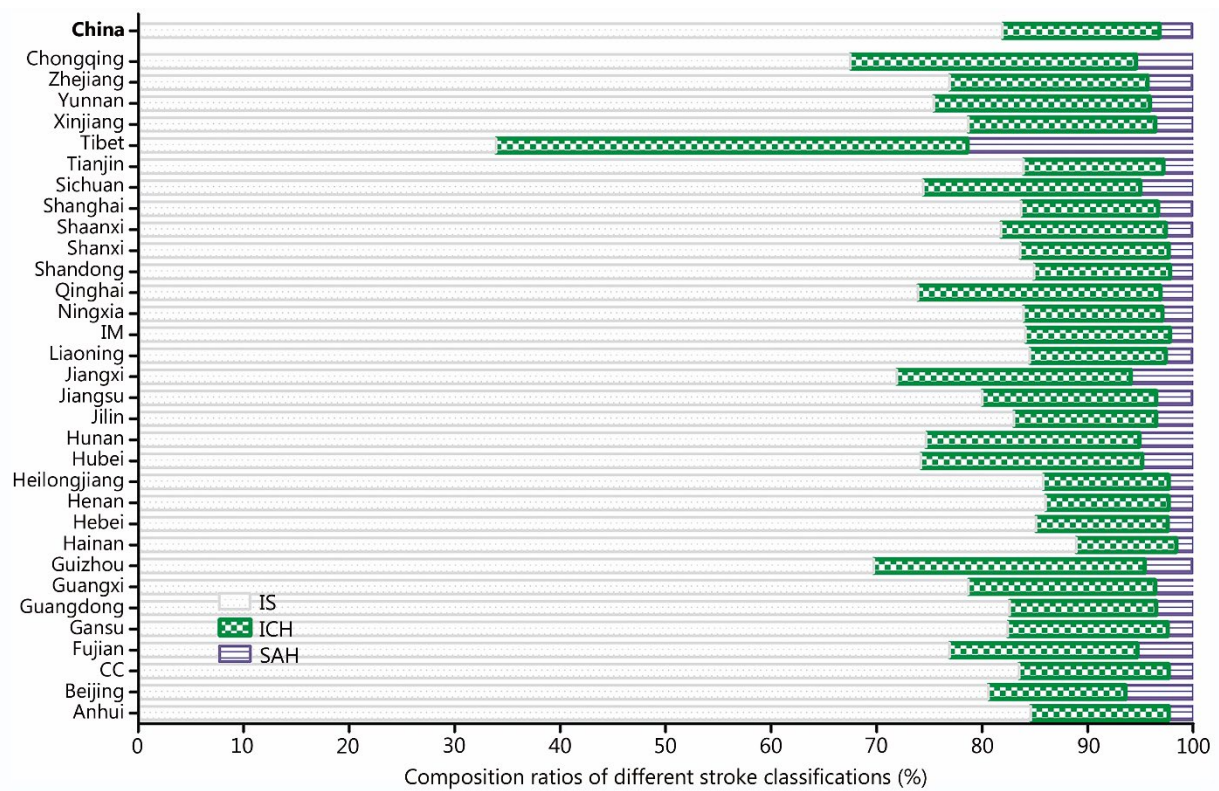

**Fig. S1** Composition of stroke in different provinces. IS ischemic stroke, ICH intracerebral hemorrhage, SAH subarachnoid hemorrhage, CC Xinjiang Production and Construction Corps, IM Inner Mongolia

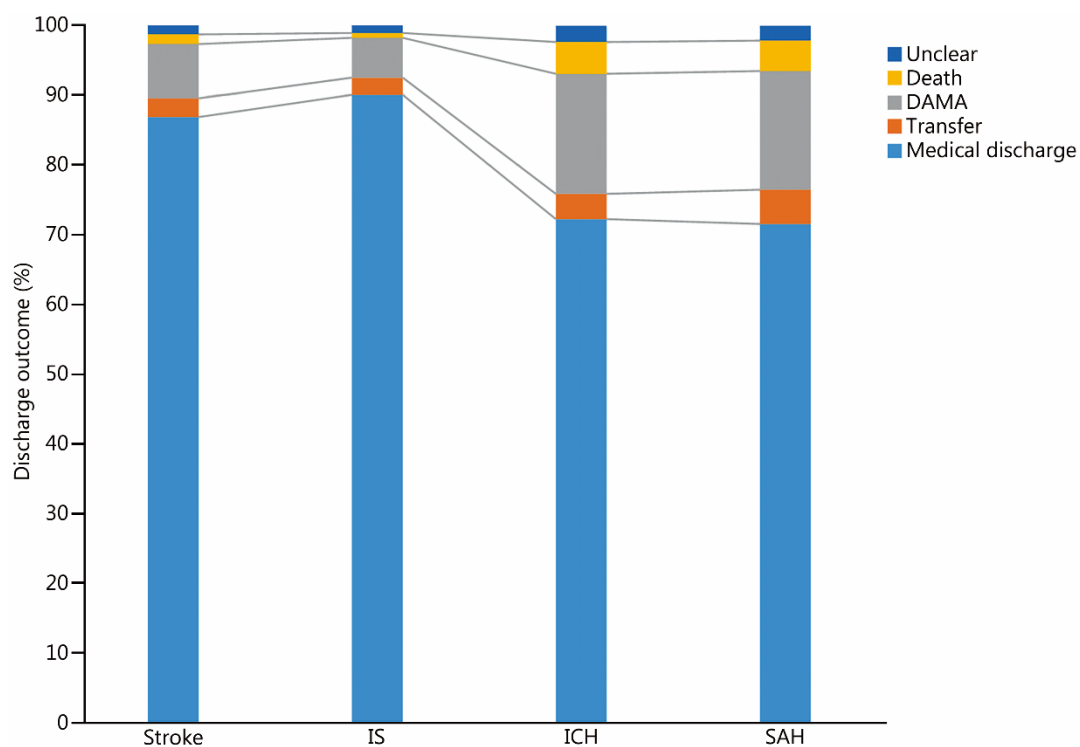

**Fig. S2** Discharge outcomes of inpatient stroke patients in China, 2020 (%). IS ischemic stroke, ICH intracerebral hemorrhage, SAH, subarachnoid hemorrhage

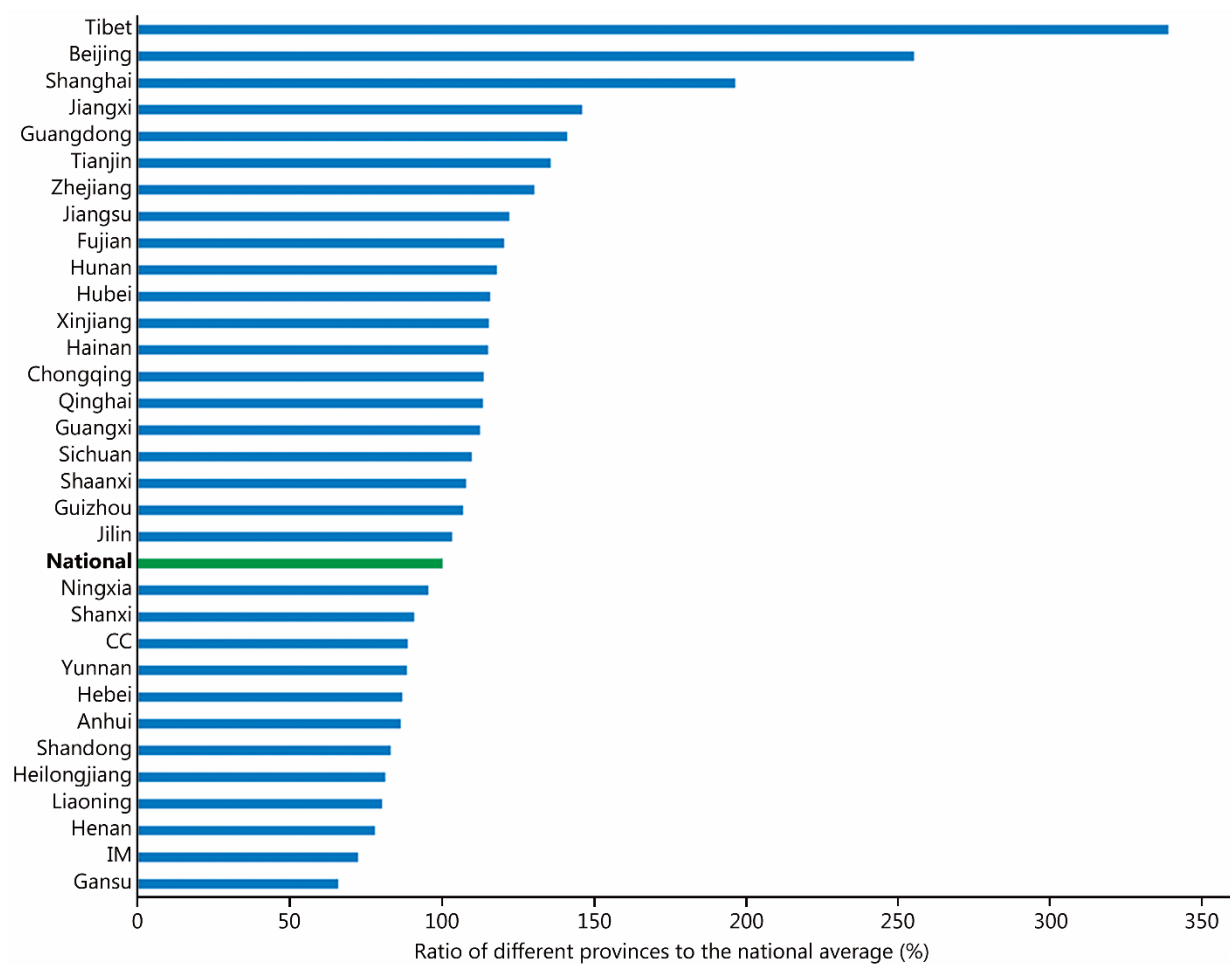

**Fig. S3** Ratio of stroke hospitalization costs in different provinces to the national average (%). CC Xinjiang Production and Construction Corps, IM Inner Mongolia

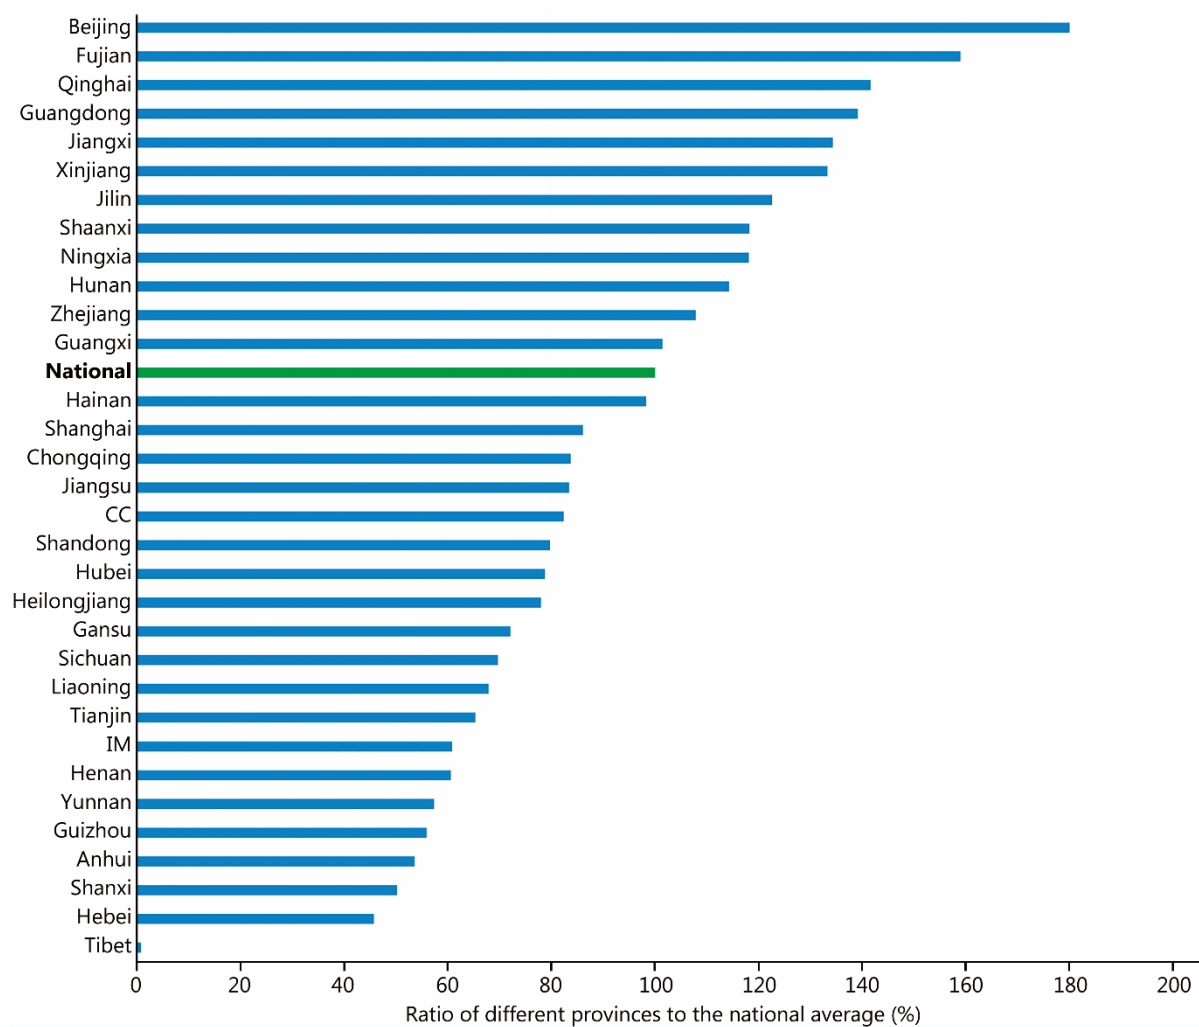

**Fig. S4** Ratio of stroke out-of-pocket expenses in different provinces to the national average (%). CC Xinjiang Production and Construction Corps, IM Inner Mongolia

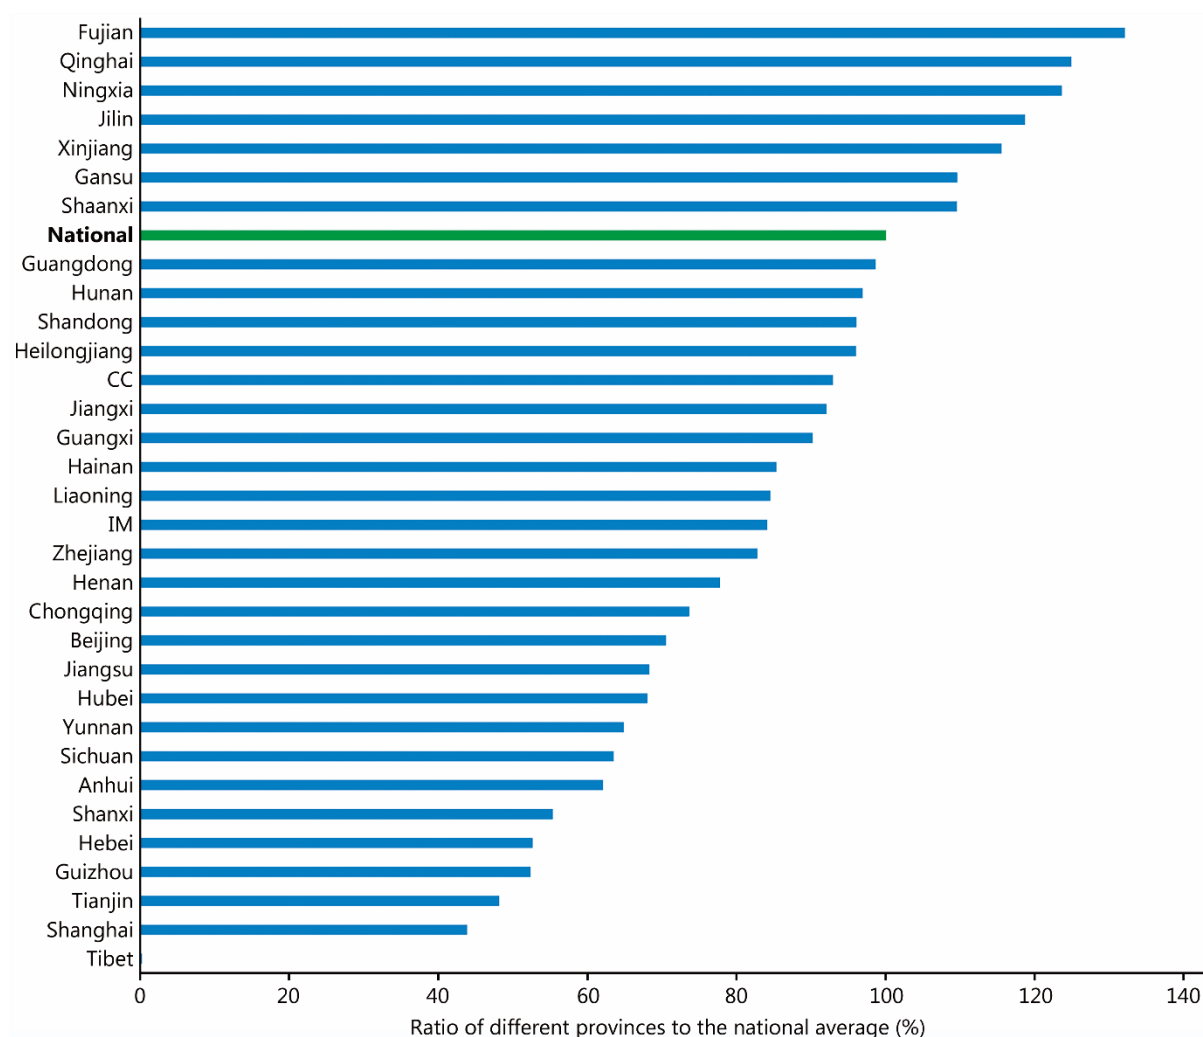

**Fig. S5** Ratio of stroke out-of-pocket expense rate in different provinces to the national average (%).

out-of-pocket expense rate = out-of-pocket expense/hospitalization expenditures. CC Xinjiang

Production and Construction Corps, IM Inner Mongolia

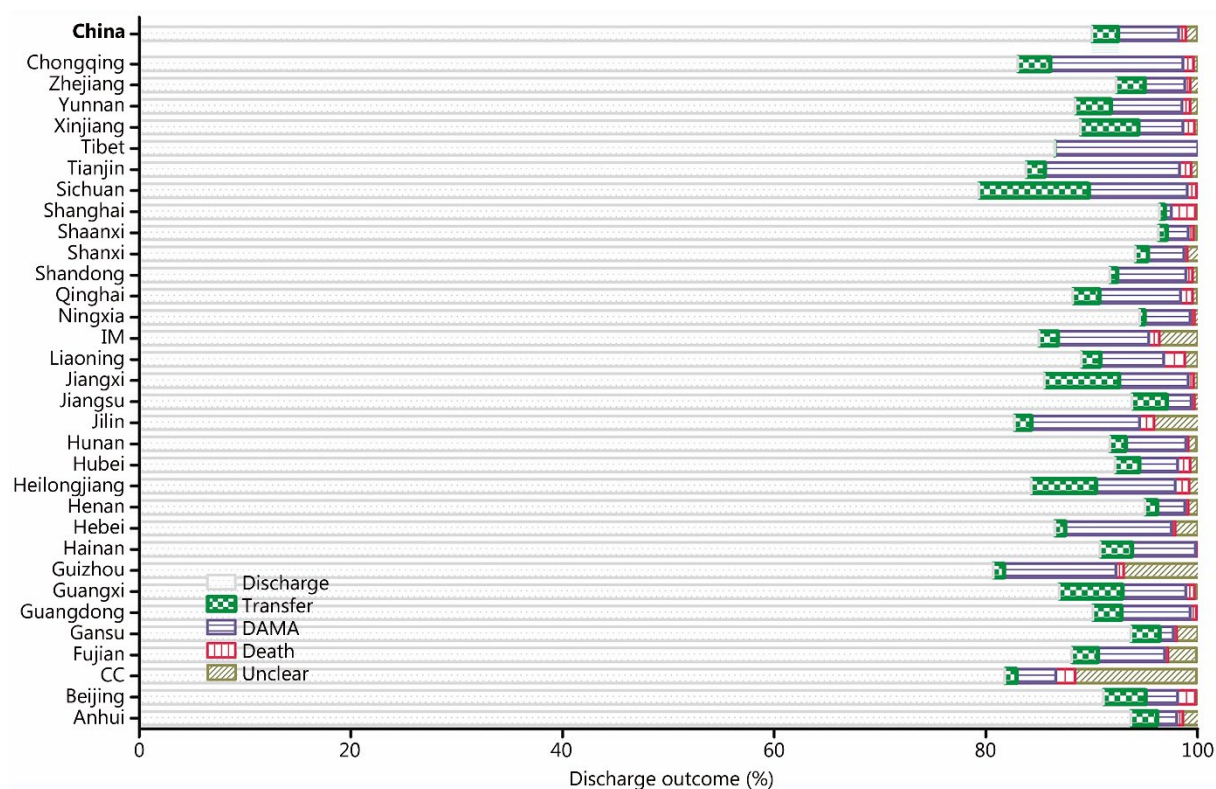

**Fig. S6** In-hospital outcomes of IS admitted to hospitals in Hospital Quality Monitoring System and Bigdata Observatory Platform for Stroke of China in 2020 by provinces (%). DAMA discharge without medical advice, IS ischemic stroke, CC Xinjiang Production and Construction Corps, IM Inner Mongolia

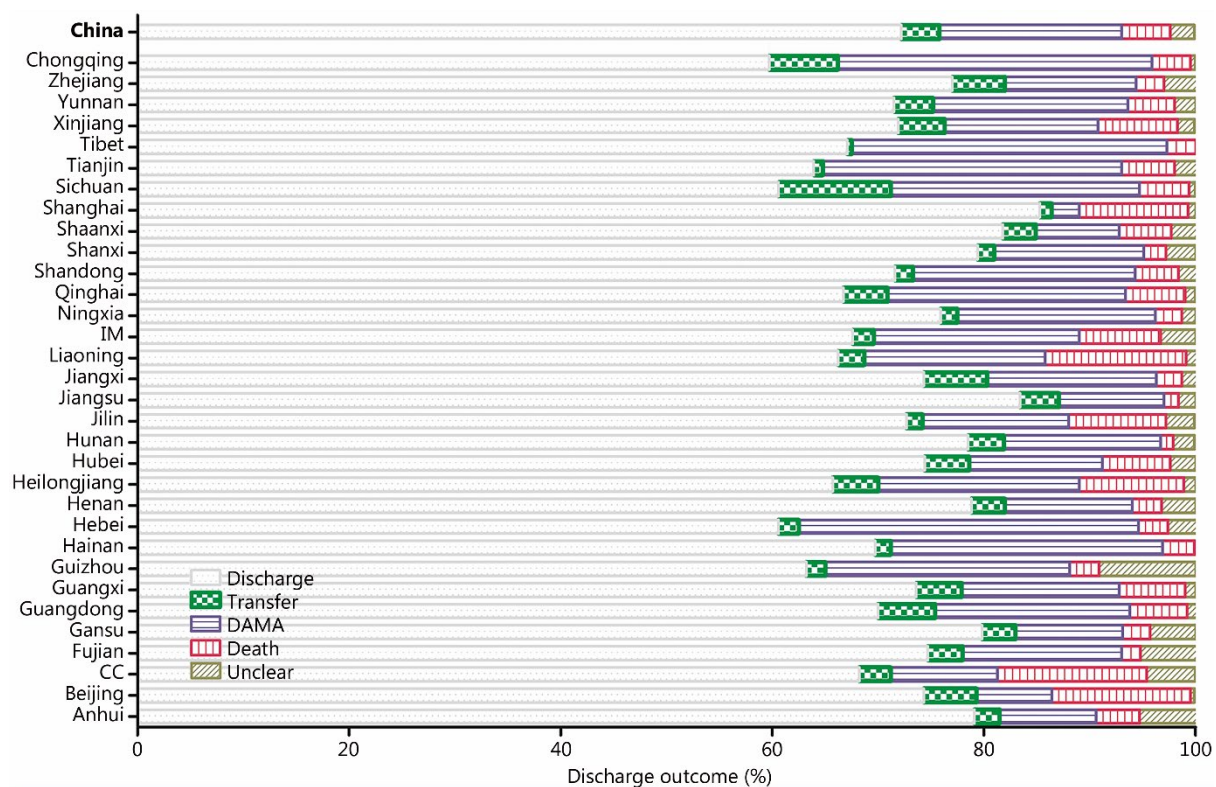

**Fig. S7** In-hospital outcomes of ICH admitted to hospitals in Hospital Quality Monitoring System and Bigdata Observatory Platform for Stroke of China in 2020 by provinces (%). DAMA discharge without medical advice, ICH intracerebral hemorrhage, CC Xinjiang Production and Construction Corps, IM Inner Mongolia



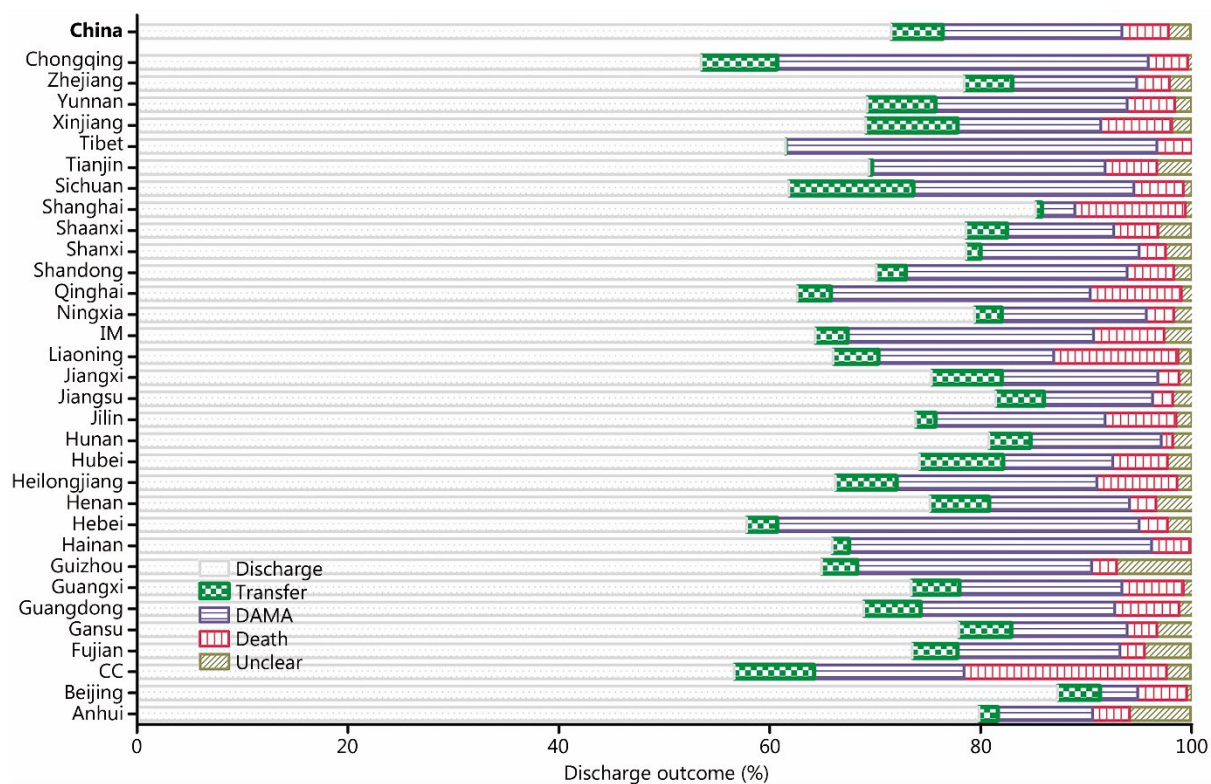

**Fig. S8** In-hospital outcomes of SAH admitted to hospitals in Hospital Quality Monitoring System and Bigdata Observatory Platform for Stroke of China in 2020 by provinces (%). DAMA discharge without medical advice, SAH subarachnoid hemorrhage, CC Xinjiang Production and Construction Corps, IM Inner Mongolia



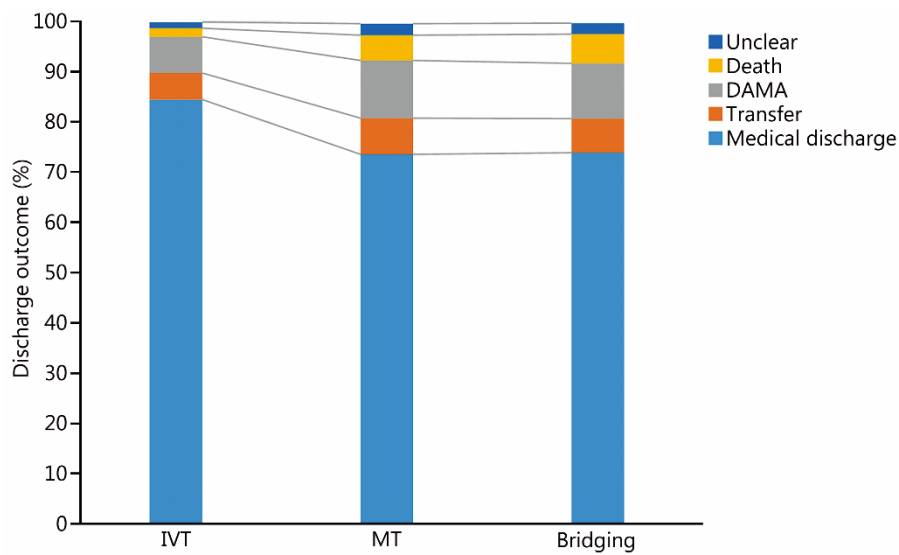

**Fig. S9** Discharge outcomes of the patients receiving different treatments for acute ischemic stroke, 2019 – 2020 (%). DAMA discharge without medical advice, IVT intravenous thrombolytic therapy, MT mechanical thrombectomy

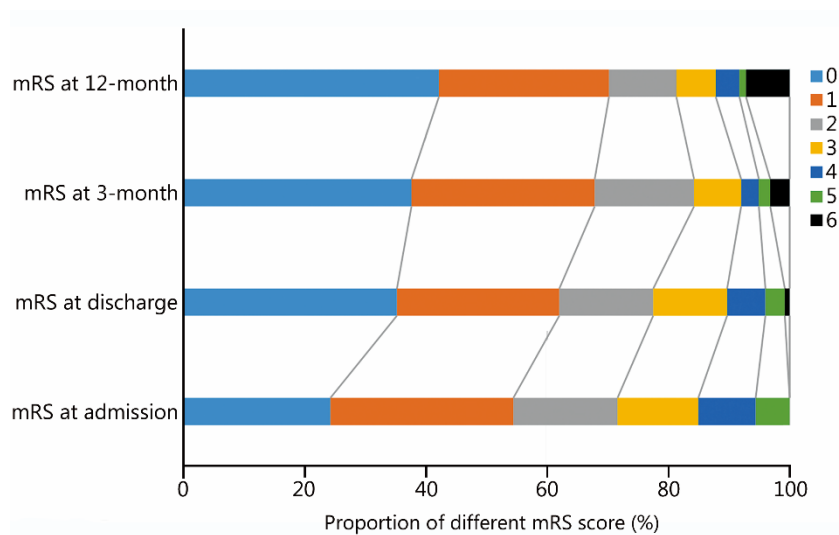

**Fig. S10** mRS scores of ischemic stroke patients at different time points (%). mRS modified Rankin Scale

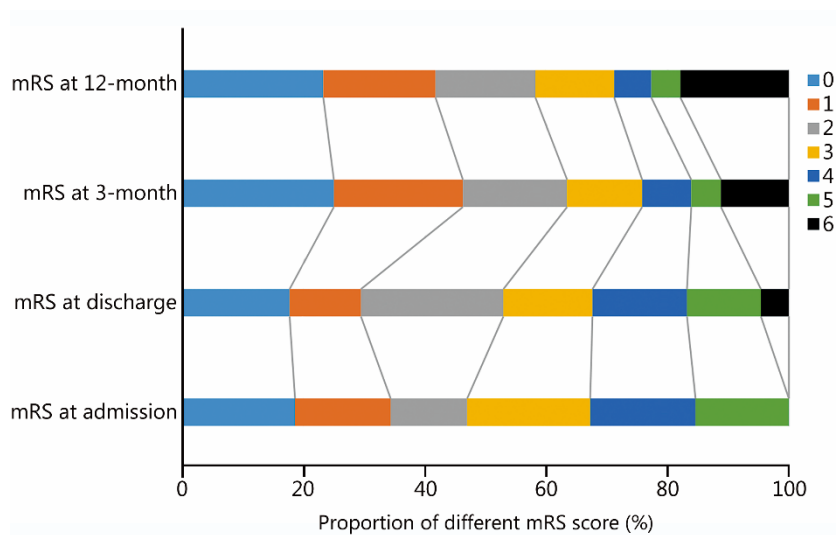

**Fig. S11** mRS scores of intracerebral hemorrhage patients at different time points (%). mRS modified Rankin Scale

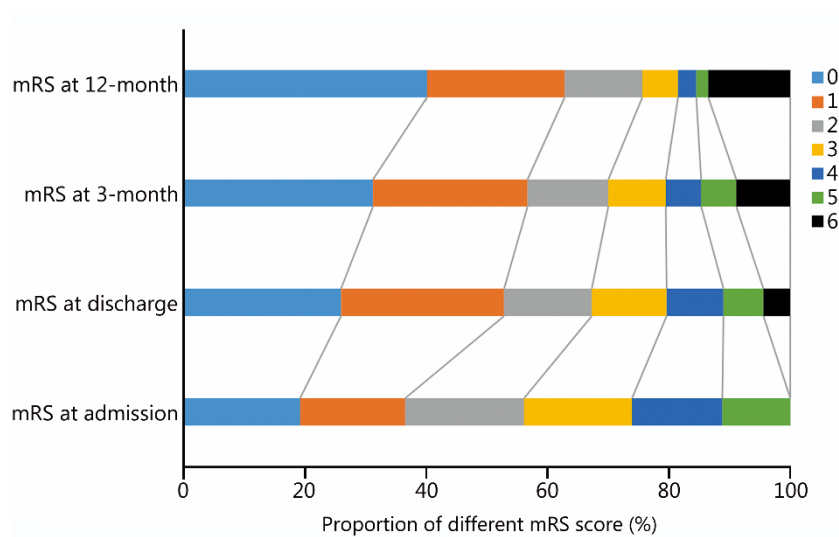

**Fig. S12** mRS scores of subarachnoid hemorrhage patients at different time points (%). mRS modified Rankin Scale
